# Supplementary material for: A porous network of boron-doped IrO2 nanoneedles with enhanced mass activity for acidic oxygen evolution reactions
Source: Royal Society of Chemistry journal article supplement (doi:10.1039/d4mh01358a), 2024-11-01
Supplement: d4mh01358a1.pdf [file d4mh01358a1.pdf]

## Electronic Supporting Information (ESI)

### **Porous network of boron-doped IrO<sub>2</sub> nanoneedles with enhanced mass activity for acidic oxygen evolution reactions**

Fei Hu,<sup>\*a</sup> Peiyu Huang,<sup>a</sup> Xu Feng,<sup>a</sup> Changjian Zhou,<sup>a</sup> Xinjuan Zeng,<sup>a</sup> Congcong Liu,<sup>c</sup>

Guangjin Wang,<sup>\*a</sup> Xiaowei Yang <sup>\*b</sup> and Huawen Hu<sup>\*a</sup>

<sup>a</sup> School of Materials Science and Hydrogen Energy, Foshan University, Foshan, 528000, P.R. China

<sup>b</sup> School of Chemistry and Chemical Engineering, Shanghai Jiao Tong University, Shanghai 200240, P.R. China

<sup>c</sup> Flexible Electronics Innovation Institute (FEII), Jiangxi Science and Technology Normal University, Nanchang 330013, P.R. China

\* Corresponding authors' email addresses: mfhufei@fosu.edu.cn; huawenhu@126.com; wgj501@163.com; yangxw@sjtu.edu.cn

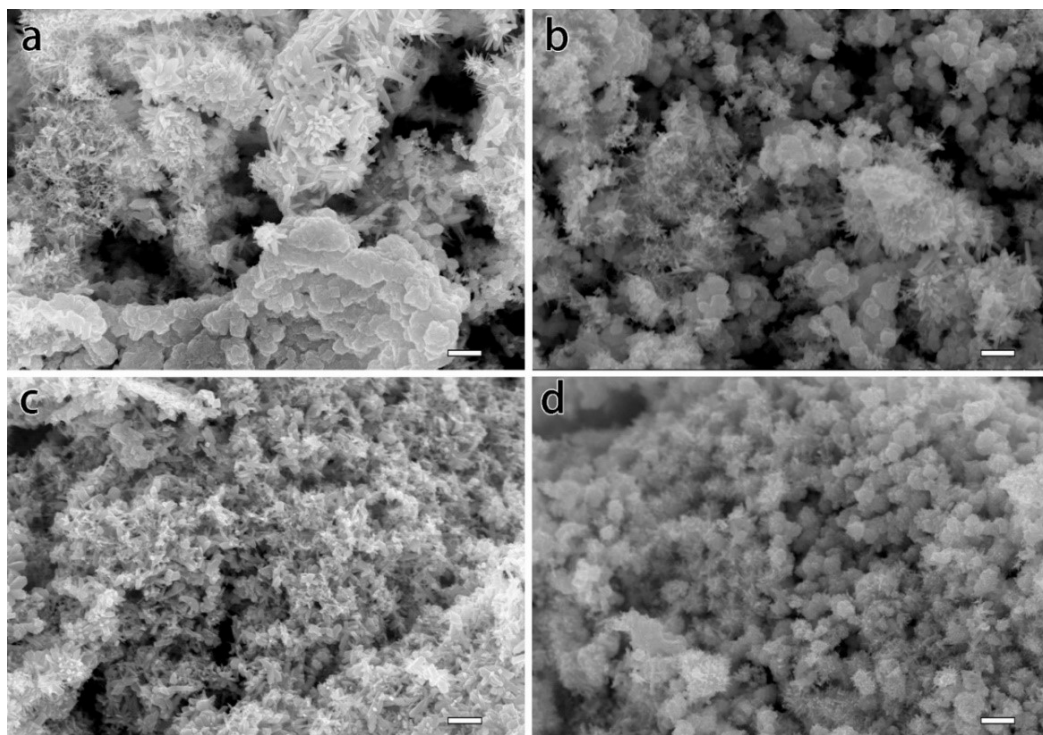

**Figure S1. a-d)** SEM images of the IrO<sub>2</sub> samples prepared with different structure-shaping agents. (a) and (b) correspond to the samples prepared using chloride ions as the structure-shaping agent, while (c) and (d) involve the use of a mixture of chloride ions and cysteamine hydrochloride as the structure-shaping agent. Scale bars in (a-d): 400 nm.

We selected typical chloride ions and cysteamine hydrochloride as the structure-shaping agent (i.e., capping agent) for the anisotropic growth of IrO<sub>2</sub>, given their strong adsorptive nature. In our preliminary experiments, we confirmed that chloride ions could function as structure-shaping agents, facilitating the formation of nanorod morphologies when used in appropriate amounts (see **Figure S1a**, and **S1b**). Additionally, we explored the combined effects of both chloride ions and cysteamine hydrochloride on the IrO<sub>2</sub> morphology variation. The coexistence of chloride ions and cysteamine hydrochloride results in enhanced uniformity of the produced nanorods or nanoneedles (please see **Figure S1c** and **d**). However, the exclusive use of cysteamine hydrochloride allowed the highest uniformity among the generated nanoneedles that intertwine into a porous network. Therefore, we selected cysteamine hydrochloride as the structure-shaping agent for the preparation of the porous network of IrO<sub>2</sub> nanoneedles. Cysteamine hydrochloride acts as a capping agent, adsorbing onto specific facets and altering the surface energy of the

IrO<sub>2</sub>-cysteamine complex. This causes the crystal to preferentially grow along the <101> direction, resulting in a nanoneedle morphology with a small tip diameter (*Mater. Lett.*, 2012, **68**, 153-156).

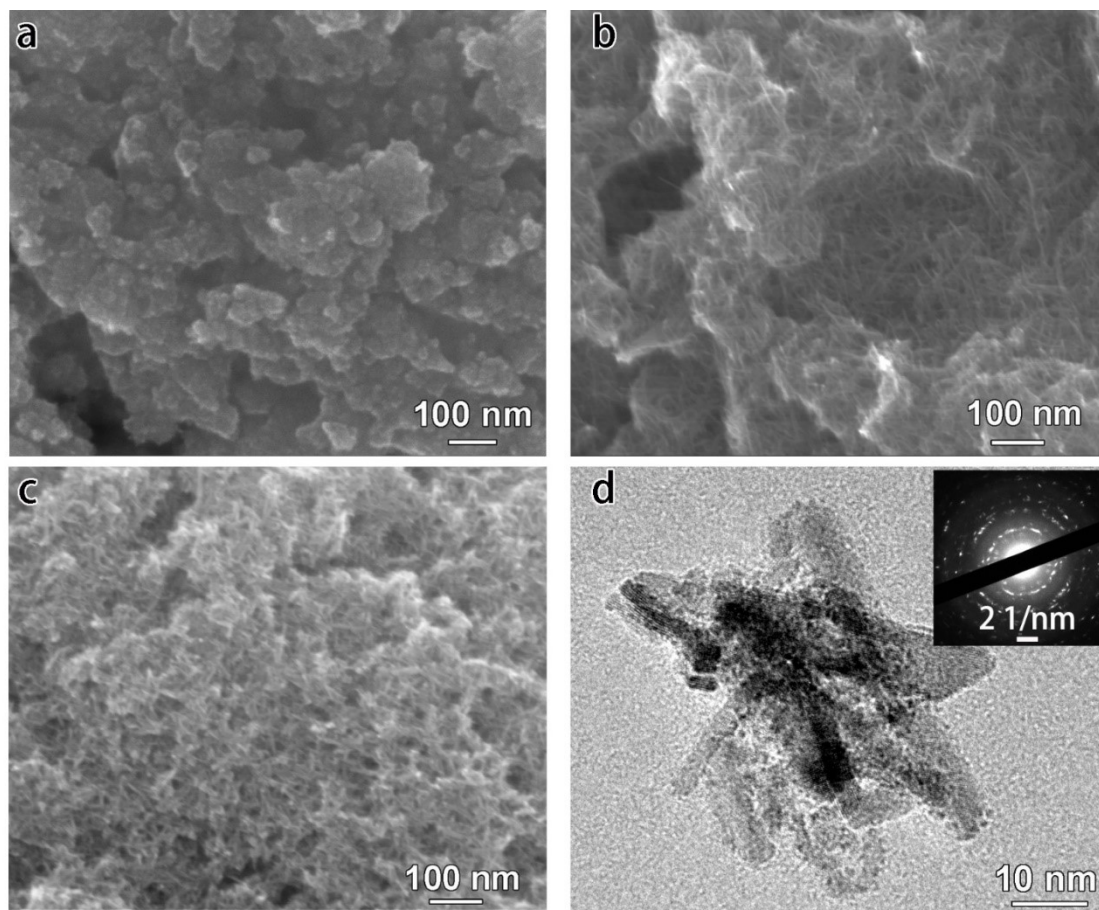

**Figure S2.** a-c) SEM images of A-IrO<sub>2</sub> (a) and B-IrO<sub>2</sub> (b), and L-IrO<sub>2</sub> (c). (d) TEM image of L-IrO<sub>2</sub>.

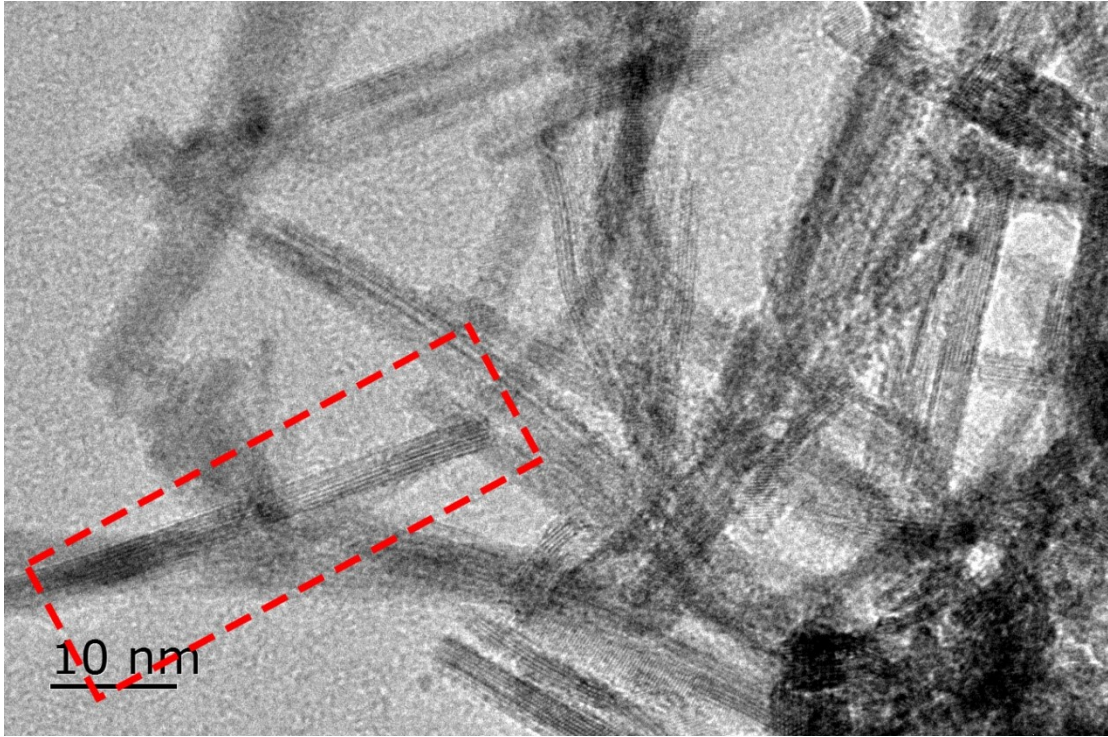

**Figure S3.** The original TEM image of B-IrO<sub>2</sub>. The red dashed rectangle highlights the region displayed in **Figure 2c**.

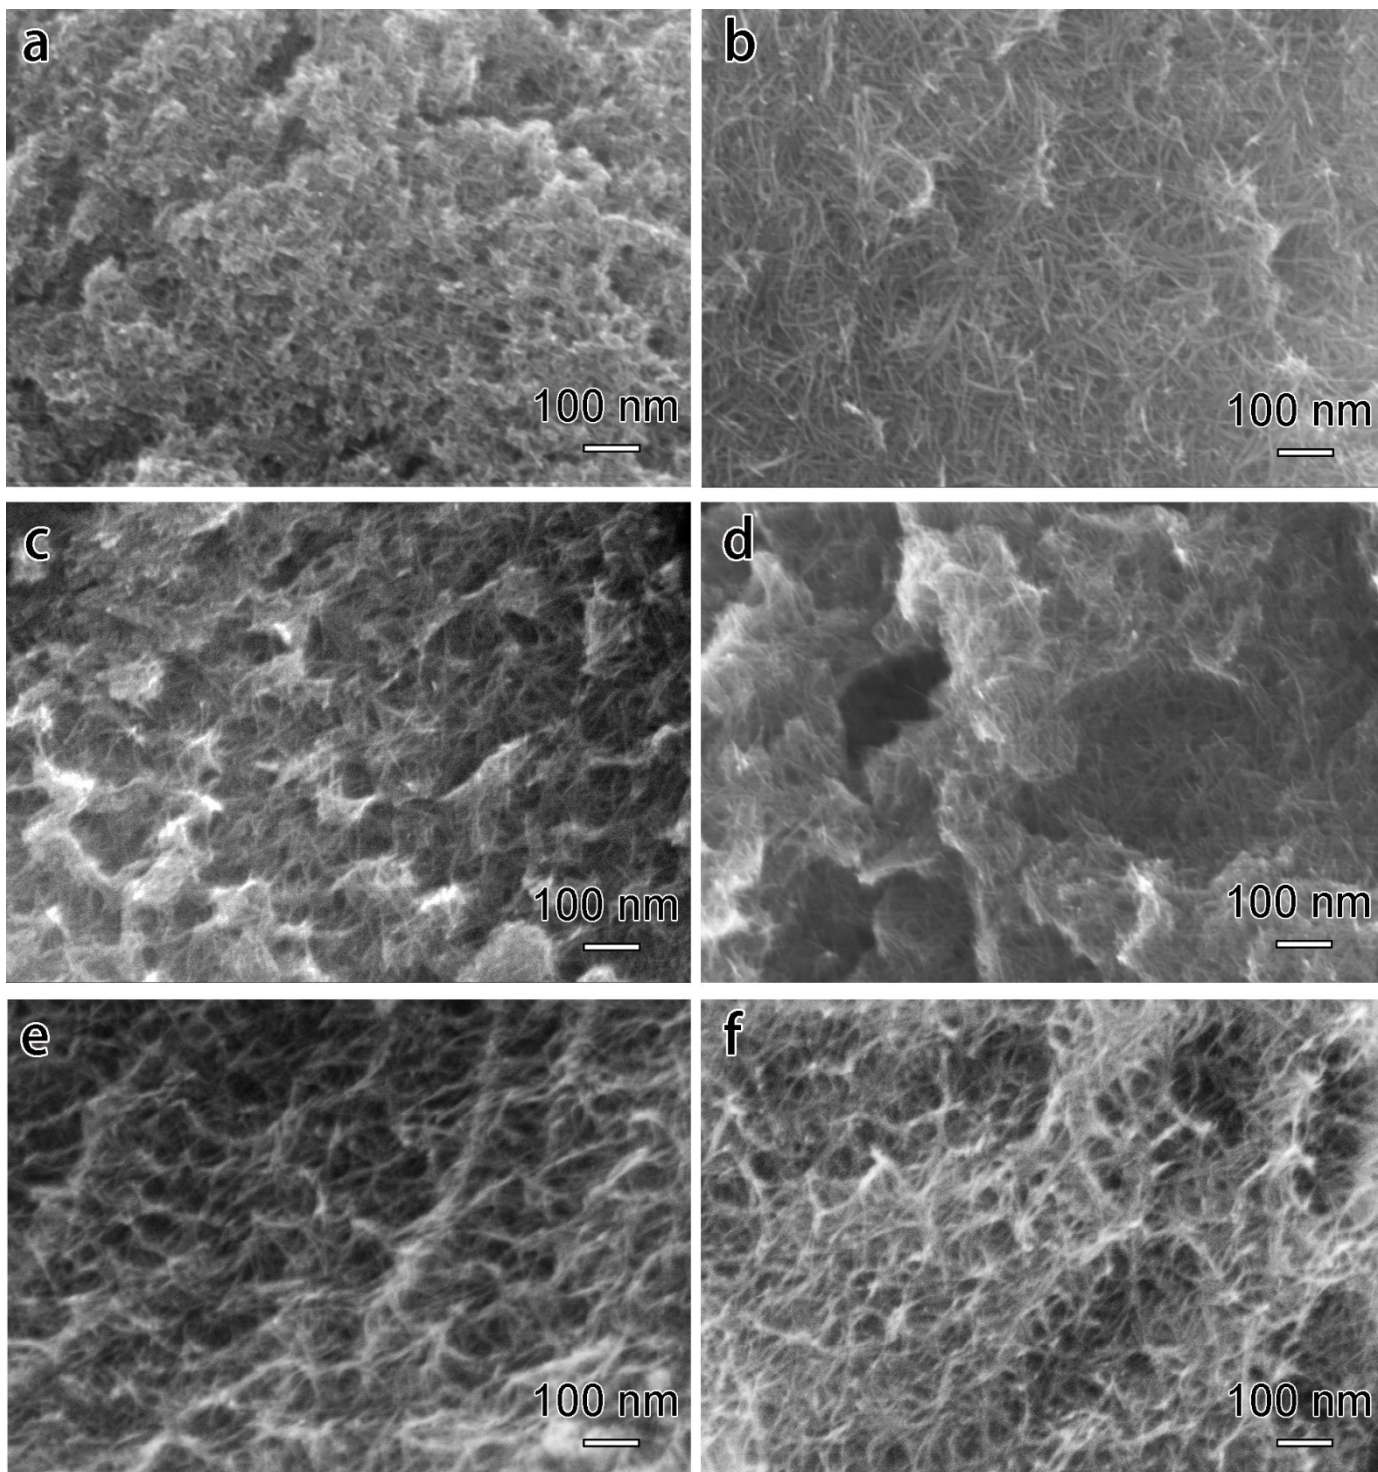

**Figure S4. a-f)** SEM images of porous networks of IrO<sub>2</sub> and B-IrO<sub>2</sub> nanoneedles synthesized at the B/Ir atomic ratios of 0 (a), 3 (b), 5 (c), 8 (d), 11 (e), and 13 (f).

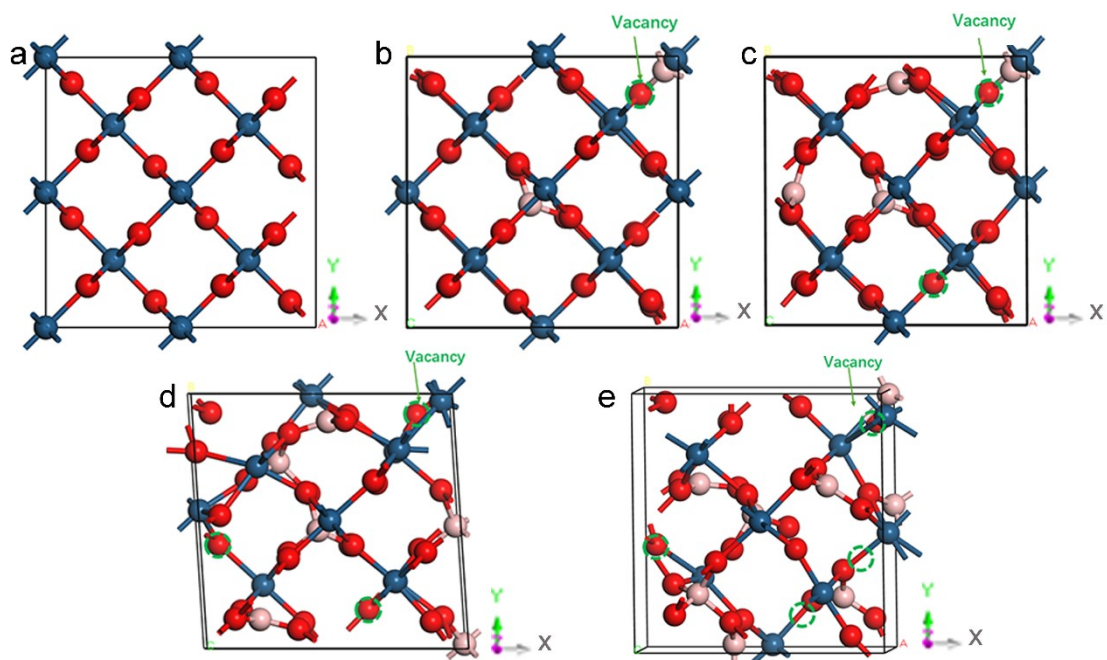

**Figure S5.** The optimized configurations of IrO<sub>2</sub> and B-IrO<sub>2</sub> constructed by doping 2, 4, 6 and 8 boron atoms based on DFT computations. Red, blue, and pink spheres represent oxygen, iridium, and boron atoms, respectively.

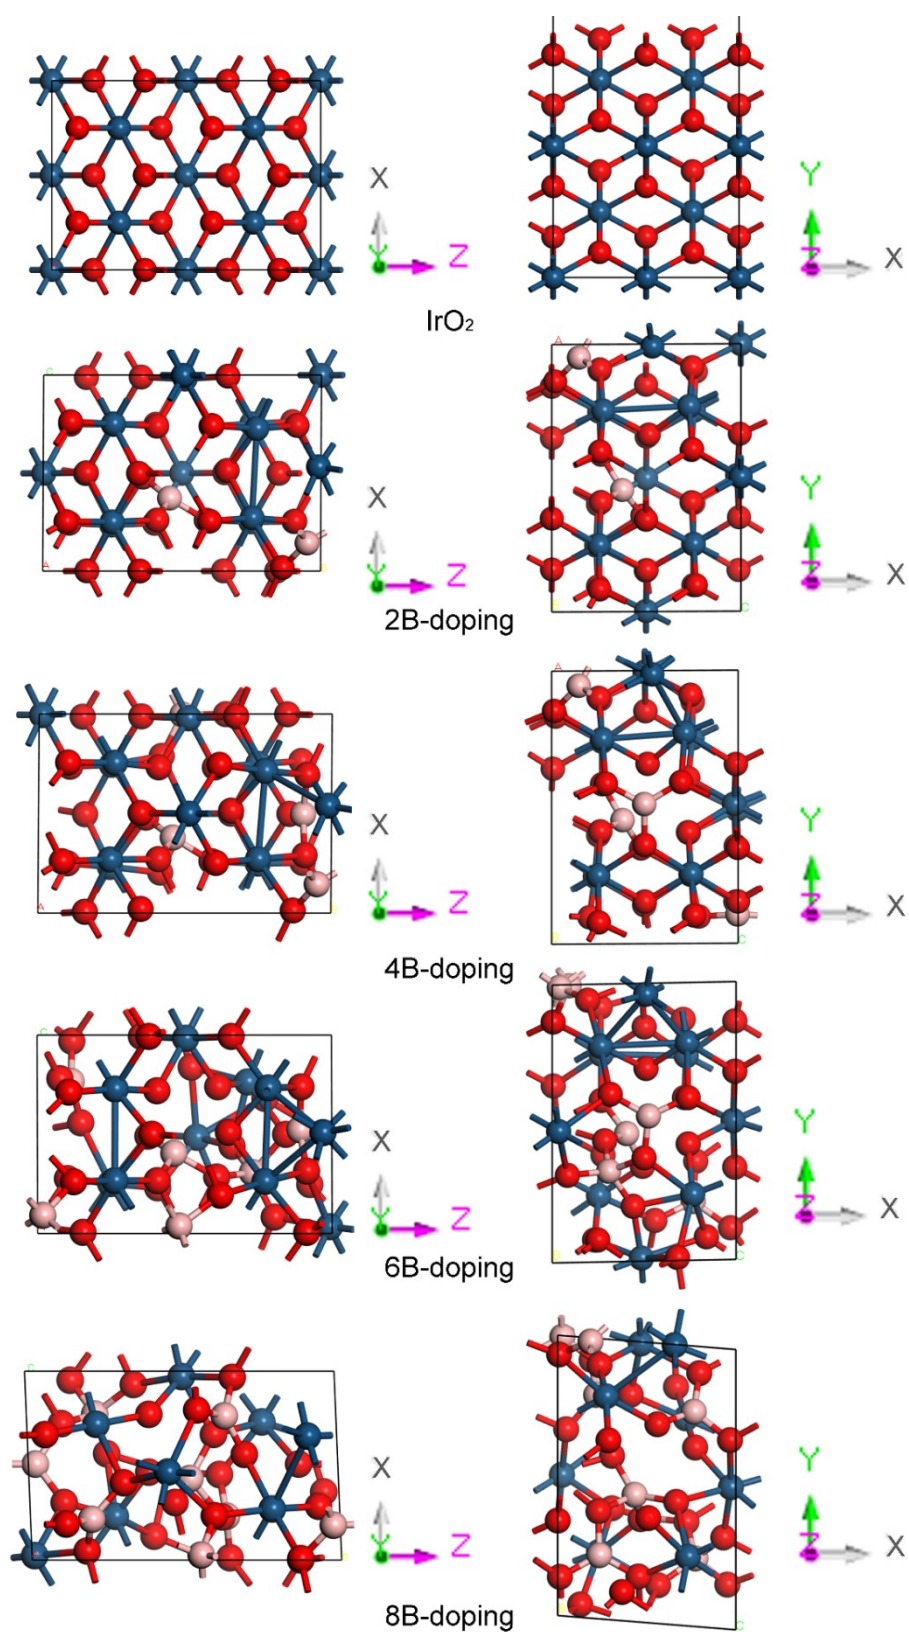

**Figure S6.** Observing the optimized configurations of  $\text{IrO}_2$  and  $\text{B-IrO}_2$  constructed by doping 2, 4, 6, and 8 boron atoms at different viewing angles based on DFT computations. Red, blue, and pink spheres represent oxygen, iridium, and boron atoms, respectively.

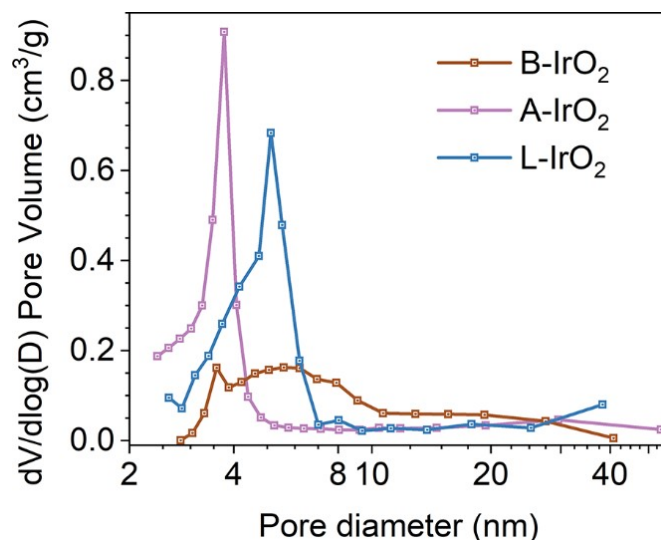

**Figure S7.** BJH pore size distribution plots depicted based on the desorption branch of the N<sub>2</sub> physisorption isotherms of the A-IrO<sub>2</sub>, L-IrO<sub>2</sub>, and B-IrO<sub>2</sub> samples.

When A-IrO<sub>2</sub> nanoparticles are transformed into L-IrO<sub>2</sub> and B-IrO<sub>2</sub> nanoneedle networks, the mesopore content increases, as evidenced by a more pronounced hysteresis loop. Additionally, B doping promotes further IrO<sub>2</sub> anisotropic crystallite growth, reducing the micropore content to some extent. Similar N<sub>2</sub> adsorption isotherms were observed for IrO<sub>2</sub>-based granules (*Nat. Commun.*, 2023, **14**, 1248; *Sci. China Mater.*, 2021, **64**, 2958-2966.) and nanoneedles (*Adv. Funct. Mater.*, 2017, **28**, 1704796; *Nat. Commun.*, 2023, **14**, 1248). The total pore volumes, micropore volumes, and BJH pore size distribution of these samples were summarized in **Table S1** and **Figure S7**. The pores in A-IrO<sub>2</sub> are primarily concentrated below 4 nm, whereas B-IrO<sub>2</sub> contains larger pores up to 10 nm. It is recognized that micropores significantly contribute to the specific surface area, as supported by references [48, 49] in the revised manuscript (*Adv. Energ. Mater.*, 2011, **1**, 678-683; *Energy Fuels*, 2023, **37**, 8284-8295). A-IrO<sub>2</sub> exhibits a micropore volume of 0.5159 cm<sup>3</sup>·g<sup>-1</sup>, which is two orders of magnitude higher than that of B-IrO<sub>2</sub> (0.0042 cm<sup>3</sup>·g<sup>-1</sup>).



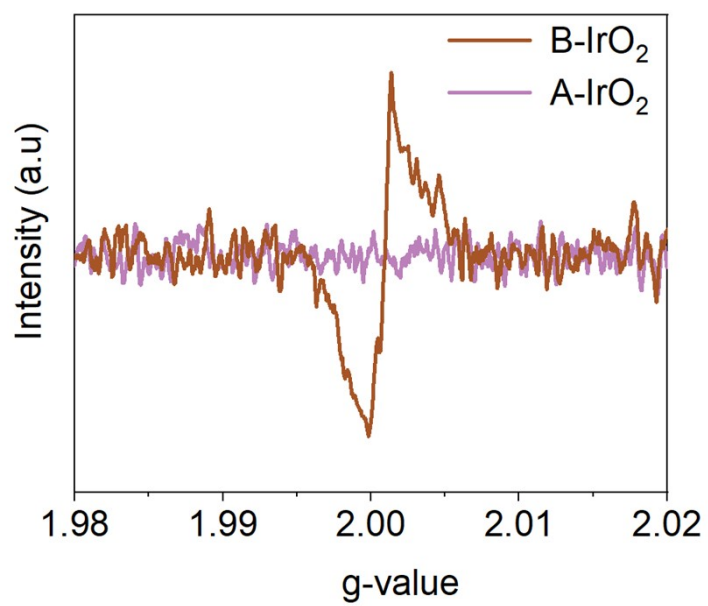

**Figure S8.** EPR spectra of the A-IrO<sub>2</sub> and B-IrO<sub>2</sub> samples.

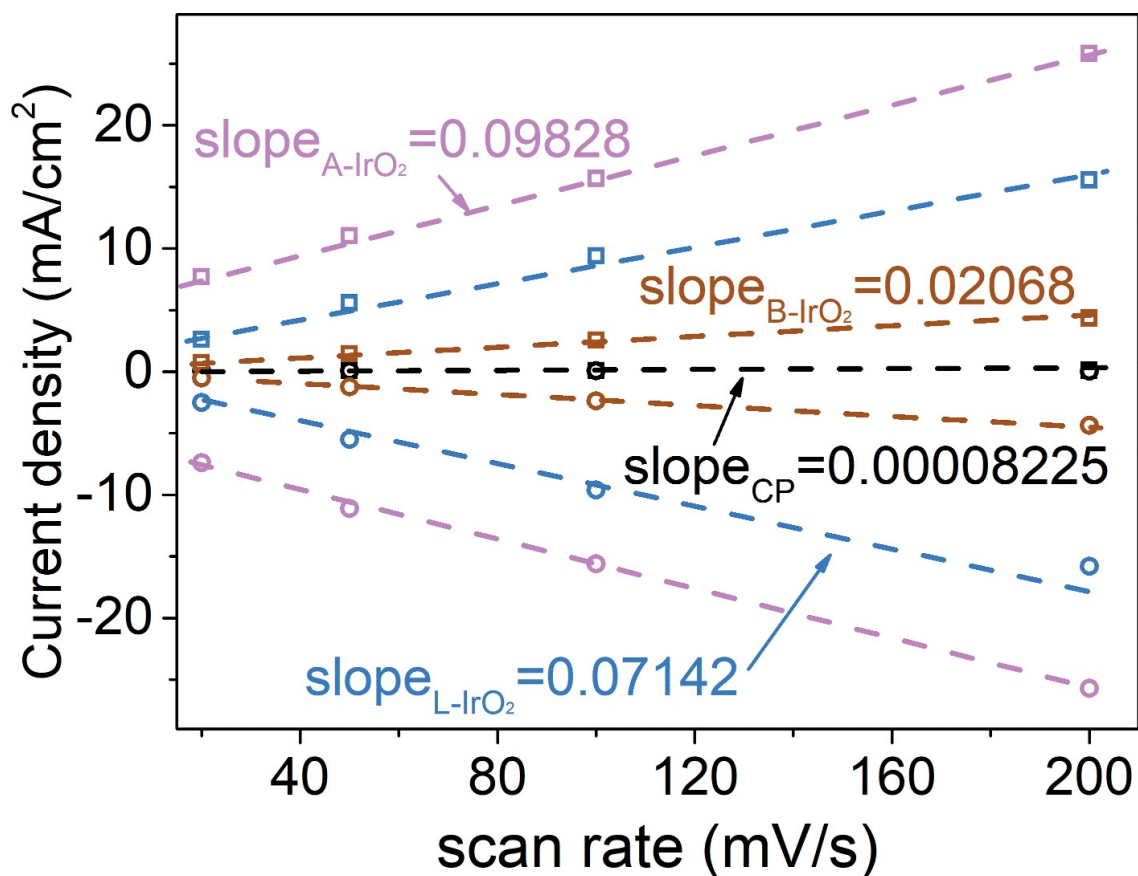

**Figure S9.** The current density against the scan rate of B-IrO<sub>2</sub>, L-IrO<sub>2</sub>, A-IrO<sub>2</sub>, and CP in the non-faradaic current regions. The  $C_{dl}$  values of B-IrO<sub>2</sub>, L-IrO<sub>2</sub>, and A-IrO<sub>2</sub> were calculated as 10.34, 35.76, and 49.14 mF·cm<sup>-2</sup>, respectively. Thus, the corresponding ECSAs of B-IrO<sub>2</sub>, L-IrO<sub>2</sub>, and A-IrO<sub>2</sub> were calculated as 344.6, 1192, and 1638, respectively.

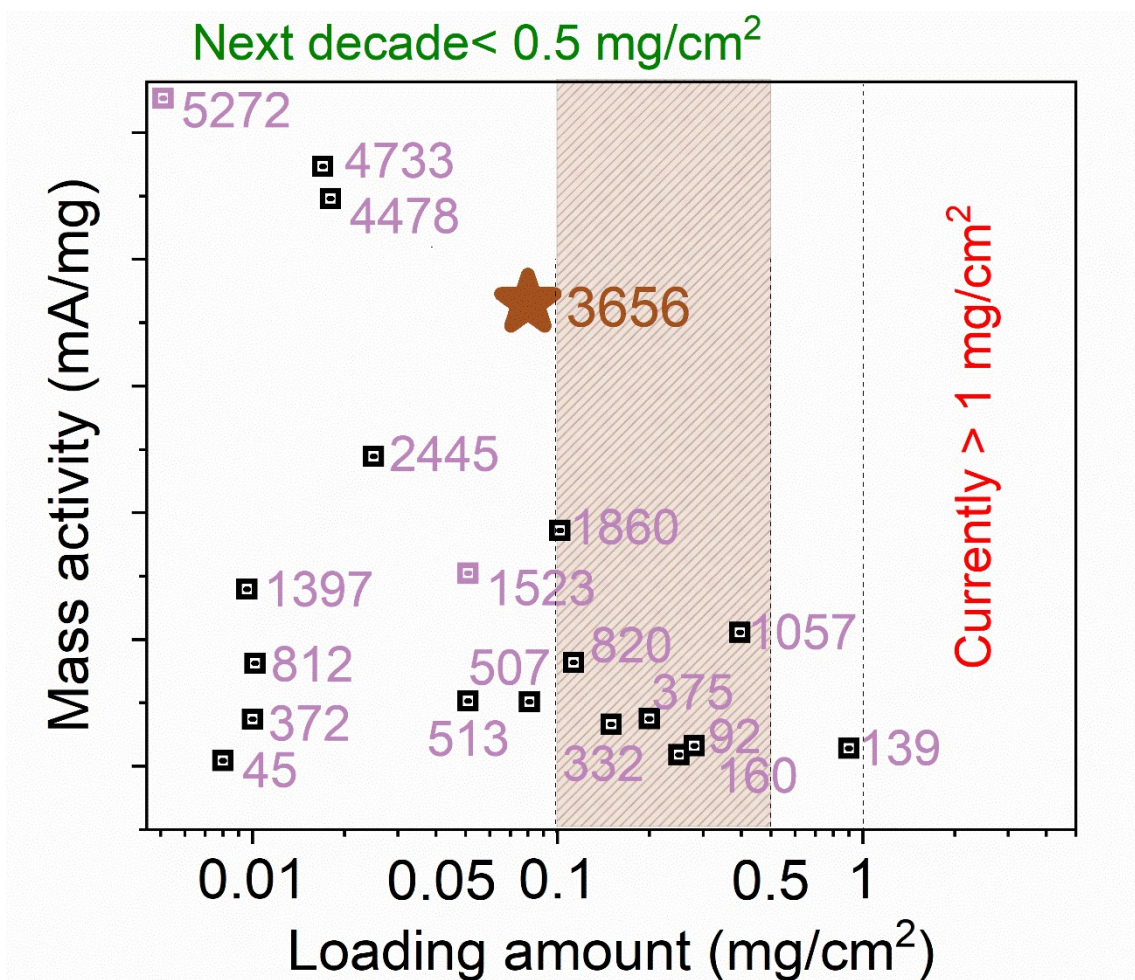

**Figure S10.** Comparison of the mass activity of our B-IrO<sub>2</sub> (indicated by an asterisk) with those of previously reported Ir-based anodes. For comparison with that of B-IrO<sub>2</sub>, the mass activities at 1.55 V<sub>RHE</sub> were extracted from the related references (please refer to the updated **Table S3** with more examples). Currently, the loading amount of the Ir catalyst is higher than 1 mg/cm<sup>2</sup>. The dashed area represents the Department of Energy (DOE)'s target, which aims to reduce Ir loading to below 0.5 mg/cm<sup>2</sup> and 0.1 mg/cm<sup>2</sup>, corresponding to projected advancements of up to 20 GW/a and 100 GW/a, respectively.

Mass activity measured using a half-cell setup may not accurately reflect the performance of a PEMWE cell, as the mass loading of Ir in PEMWE systems is generally greater than 1 mg/cm<sup>2</sup> due to the considerations related to anode preparation and the lifetime of the PEMWE [Science 384 (2024) 666-670; Adv. Mater. 36 (2024) 2402643; Adv. Mater. 36 (2024) 2314049; J. Am. Chem. Soc. 146 (2024) 7858-7867]. Our PEMWE incorporating 0.08 mg<sub>Ir</sub>/cm<sup>2</sup> of B-IrO<sub>2</sub> possessed the mass activities to be 3625 and 10025 mA·mg<sub>Ir</sub><sup>-1</sup> at cell voltages of 1.6 and 1.9 V, respectively.

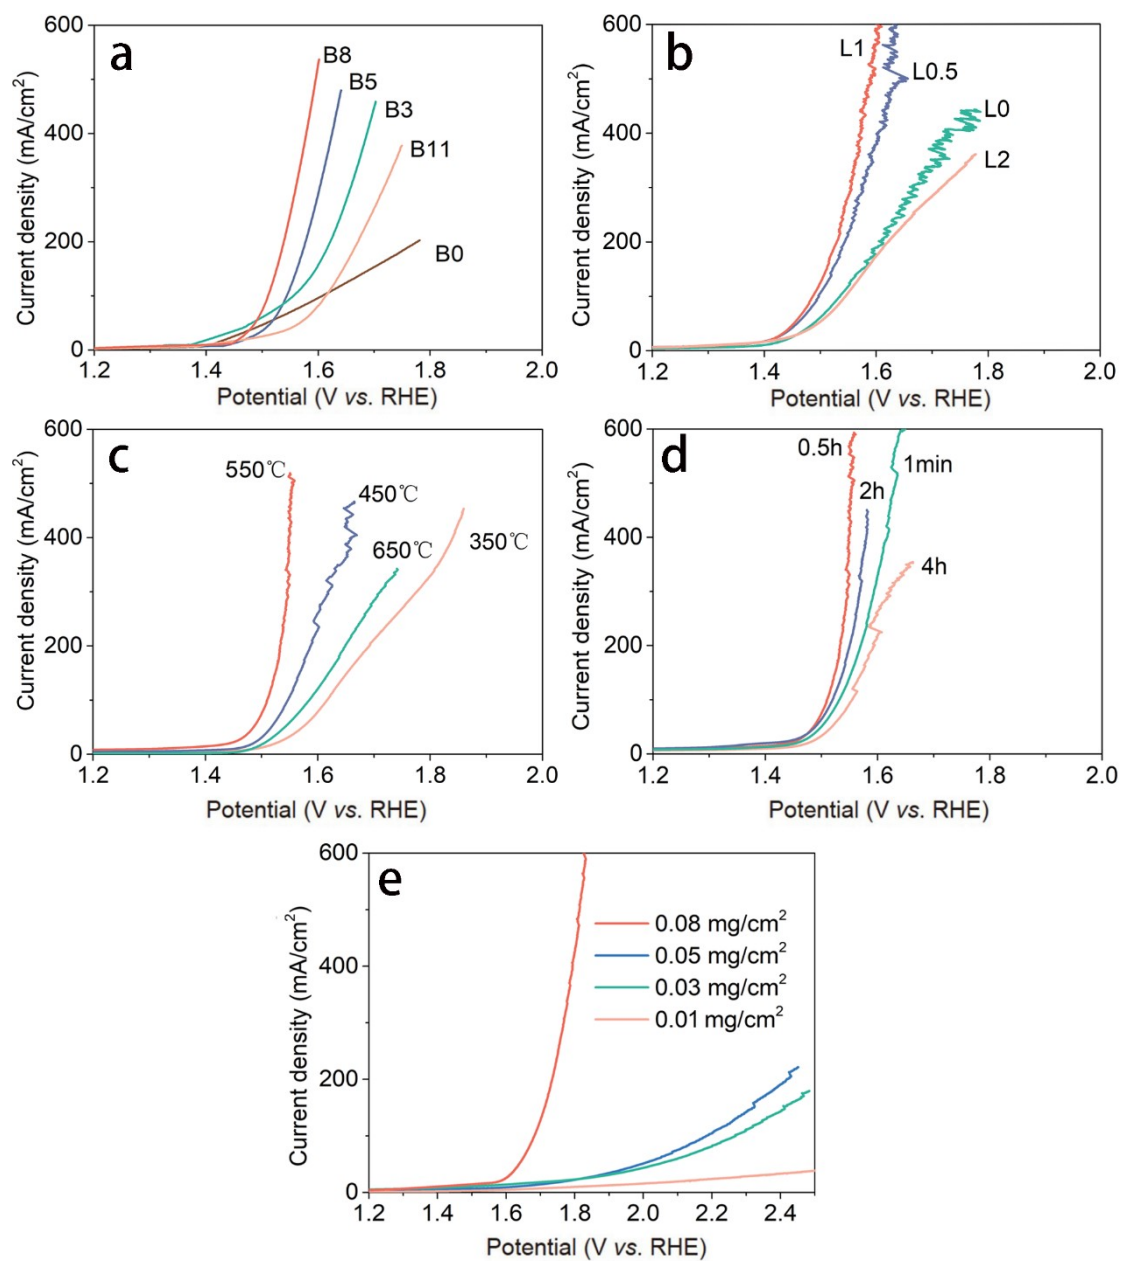

**Figure S11.** a-e) Effects of boron contents in precursors (a), cysteamine-HCl contents in precursors (b), calcination temperatures (c), holding durations (d), and loading amounts (e) on the OER performance of B-doped IrO<sub>2</sub>.

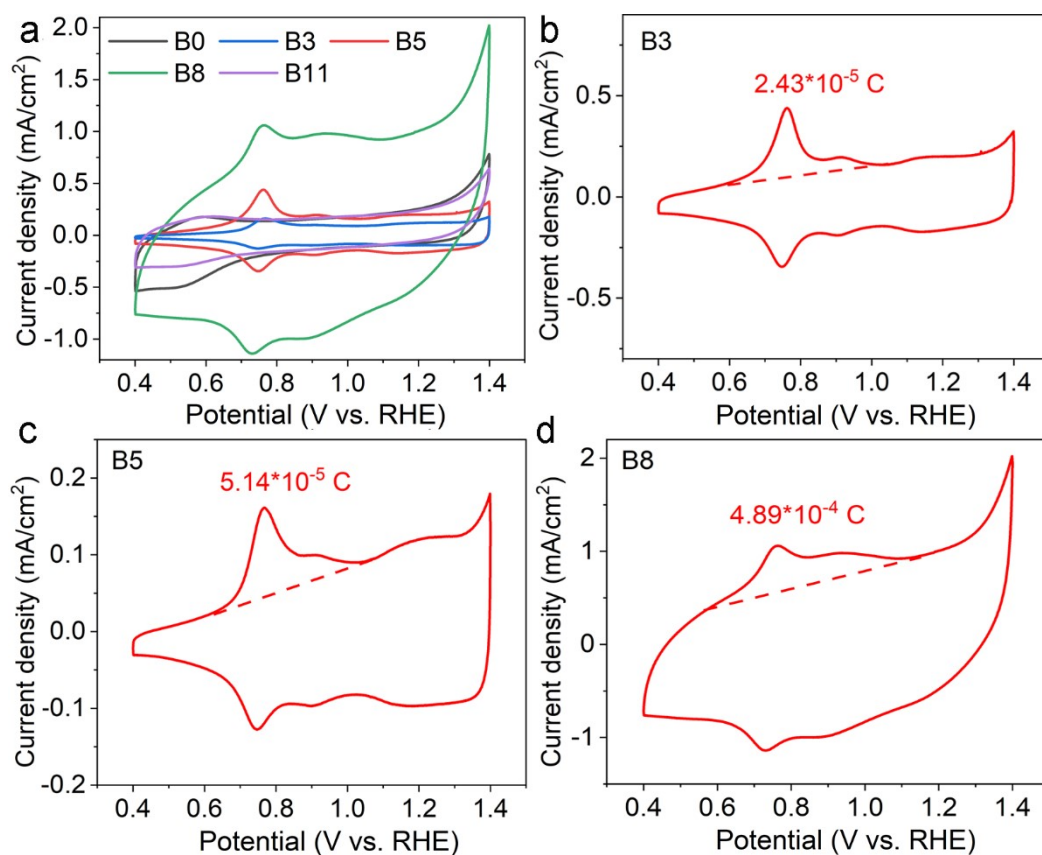

**Figure S12.** (a) Overlapped CV curves of a series of B-doped IrO<sub>2</sub> samples bearing different B doping extents (including B3, B5, B8, and B11) for measuring their active Ir sites. (b-d) Single CV curves of different B-doped IrO<sub>2</sub> samples, including B3 (b), B5 (c), and B8 (d). Note that redox peaks can barely be observed in (a) for the B11 sample with excessive B doping. It can be noted that the B8 (namely B-IrO<sub>2</sub>) sample exhibits the greatest number of electrochemically active Ir sites.

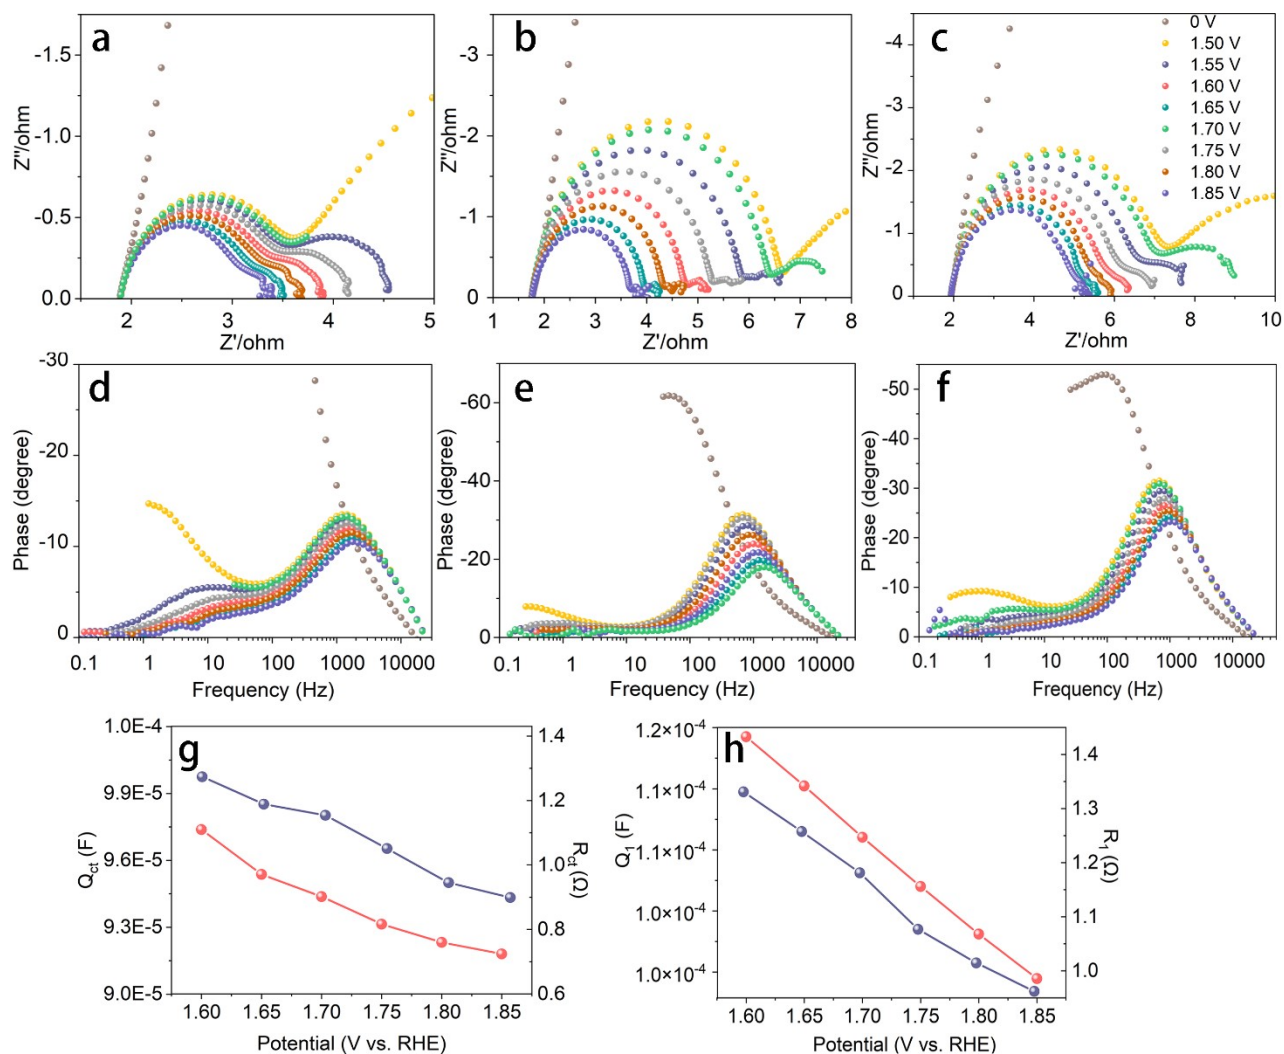

**Figure S13.** a-f) Nyquist plots (a-c), and Bode plots (d-f) of A-IrO<sub>2</sub> (a, d), L-IrO<sub>2</sub> (b, e), and B-IrO<sub>2</sub> (c, f) at different potentials. (g, h) The optimum fitting values of R<sub>ct</sub> and Q<sub>ct</sub> (g) and R<sub>1</sub> and Q<sub>1</sub> (h) plotted as a function of applied potentials for B-IrO<sub>2</sub>.

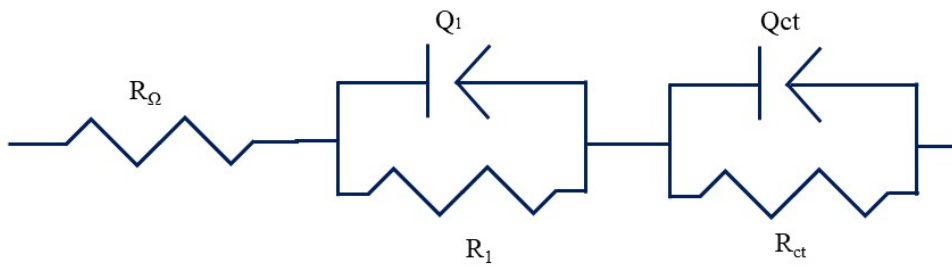

**Figure S14.** Equivalent circuit used for fitting the impedance data presented in **Figure S13a**.

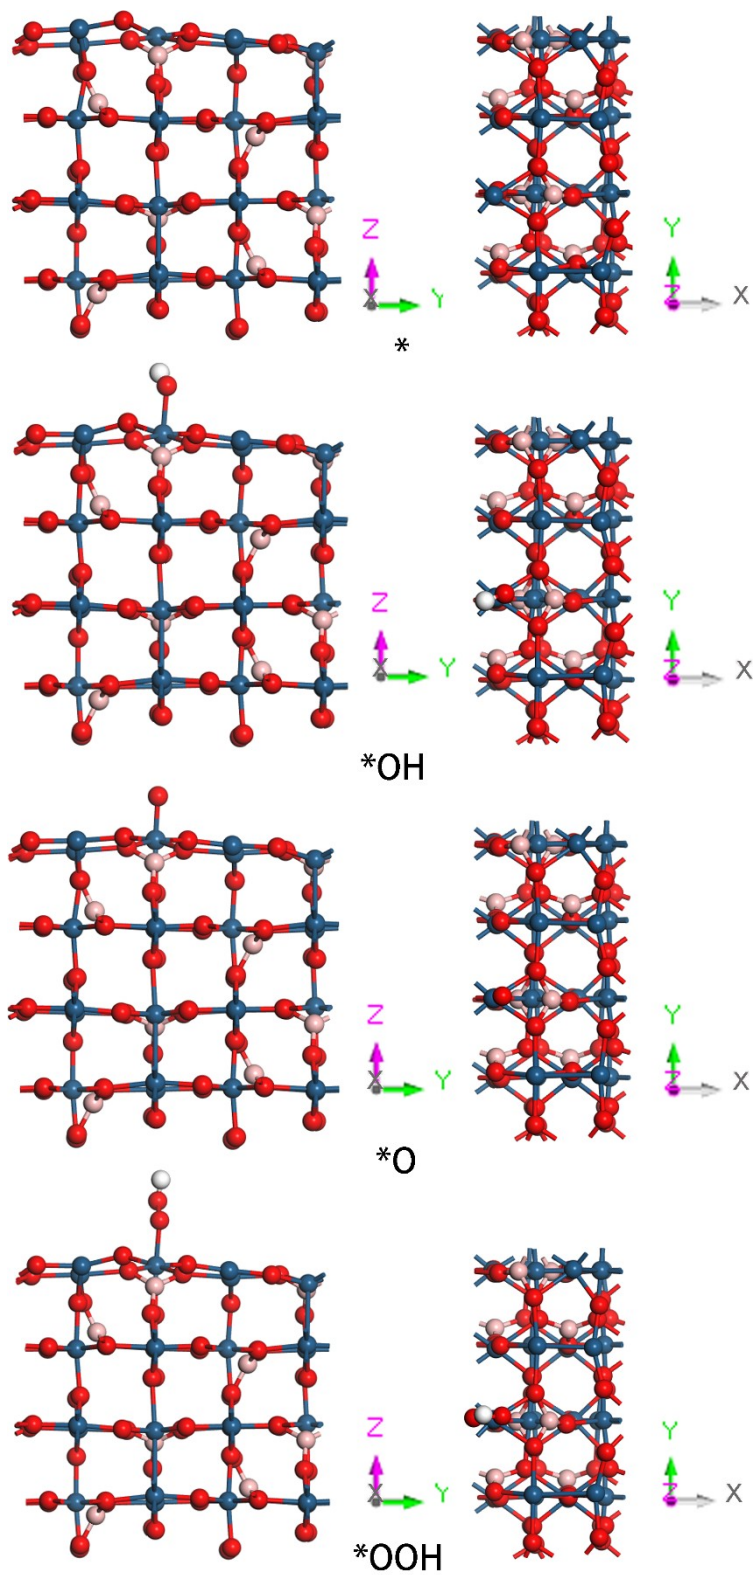

**Figure S15.** The optimized atomic models for OER intermediates on B-IrO<sub>2</sub>: (a) side view, (b) top view.



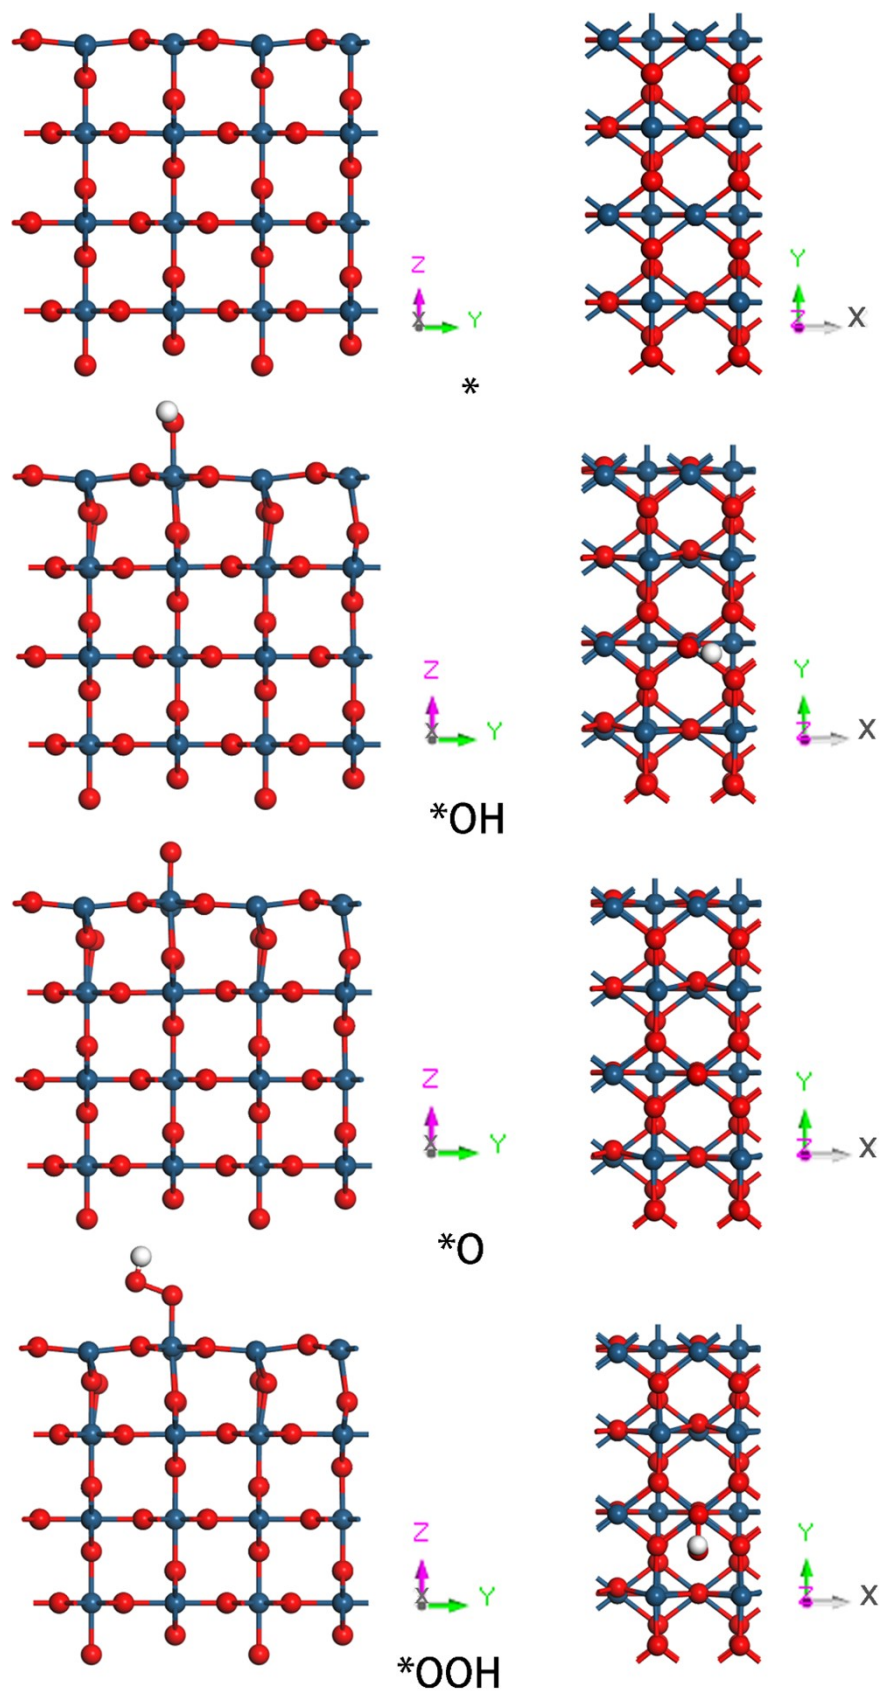

**Figure S16.** The optimized atomic models for OER intermediates on  $\text{IrO}_2$ : (a) side view, (b) top view.

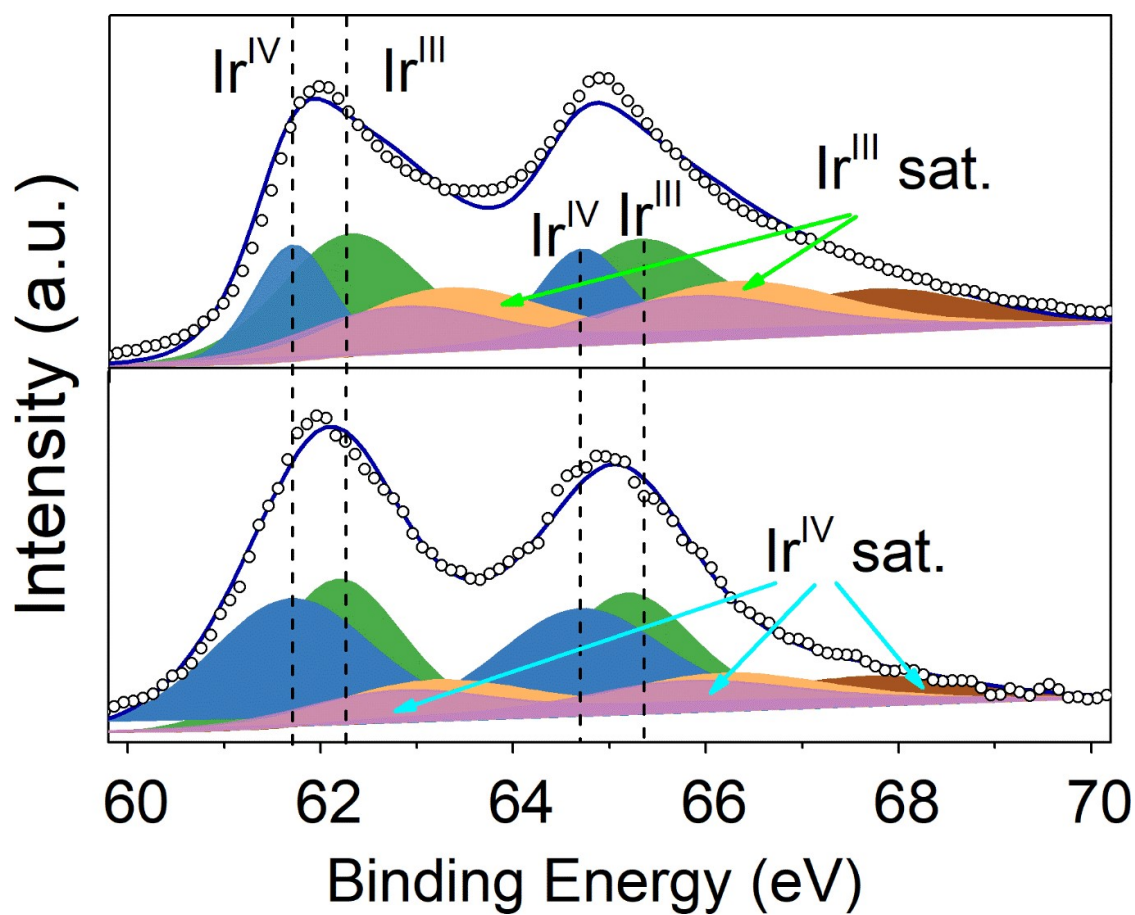

Figure S17. Ir 4f XPS spectra for B-IrO<sub>2</sub> before and after the stability test.

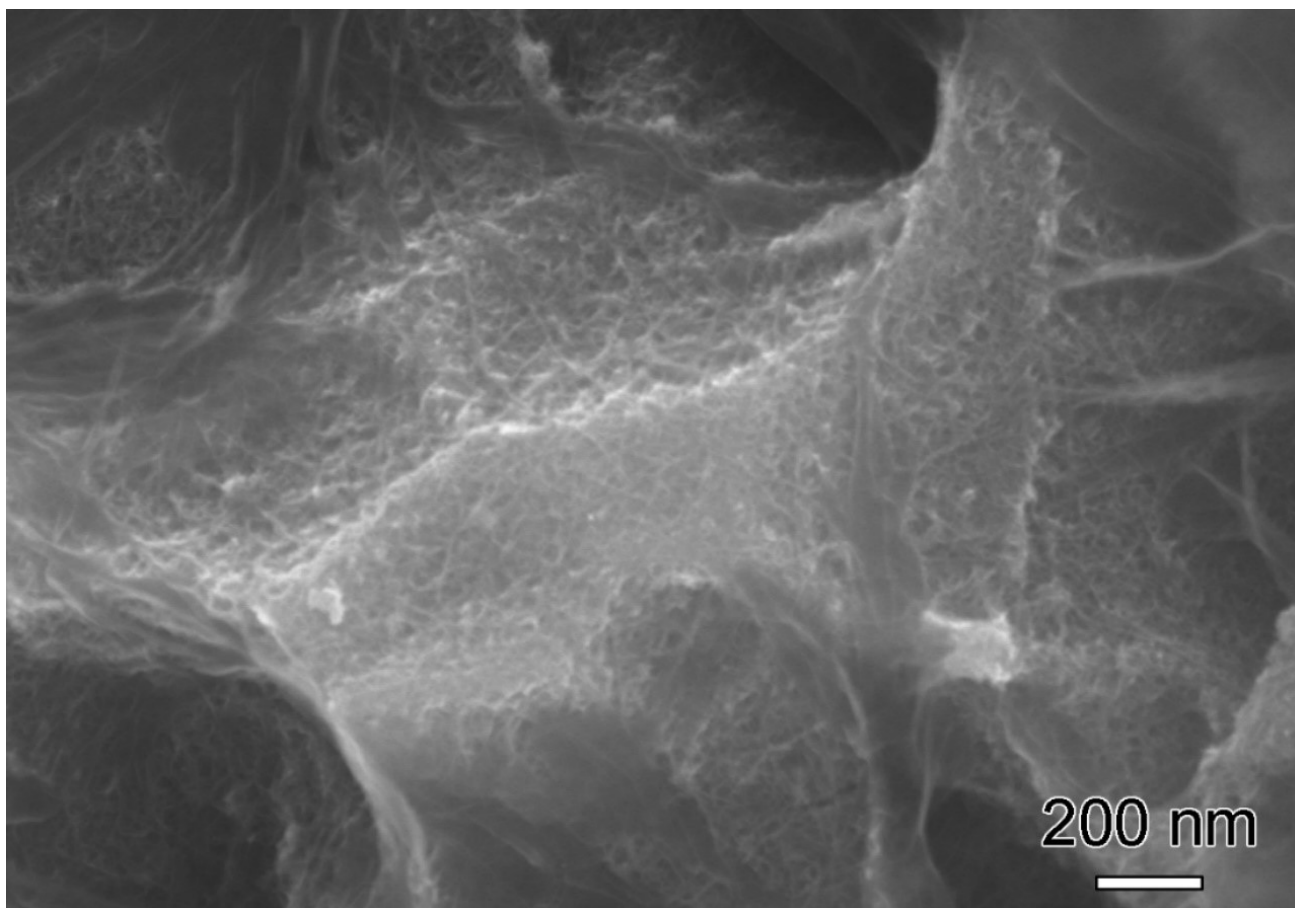

**Figure S18.** SEM image showing the distinct structure of B-IrO<sub>2</sub> on the Ti-felt substrate.

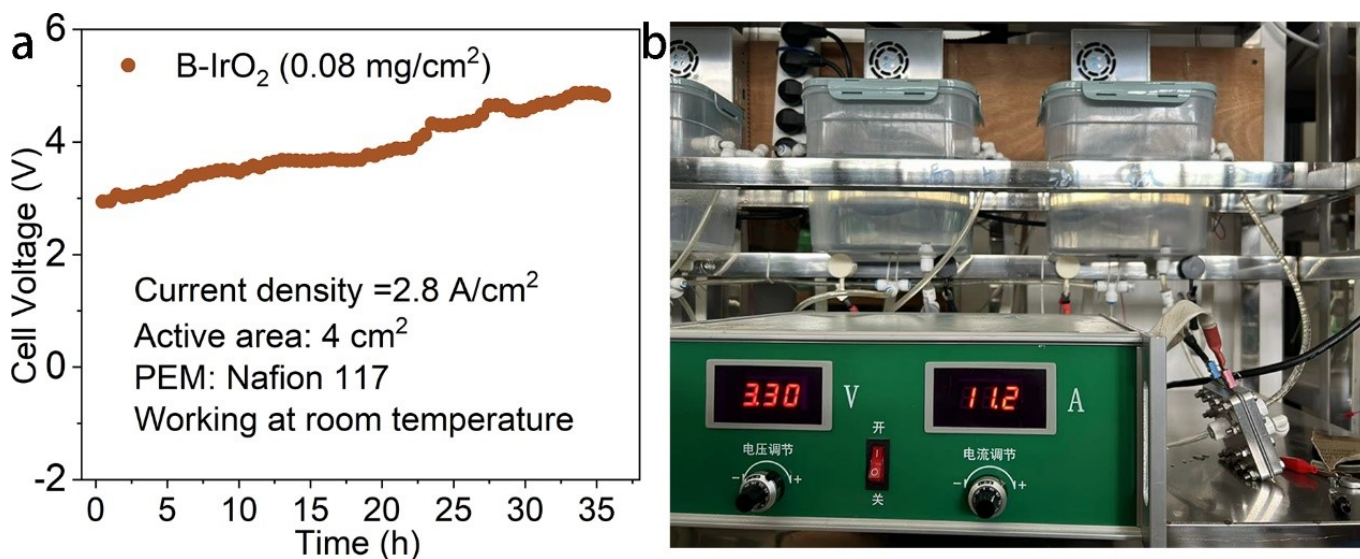

**Figure S19.** (a) Static durability test of the B-IrO<sub>2</sub> catalyst in a PEMWE single cell by galvanostatic operation at 2.8 A·cm<sup>2</sup> for 35 h. (b) On-site observation of the operation current and voltage after running for 5 h.

The rapid proton transfer in the PEMWE system is advantageous for achieving high current density output. However, it presents a challenge for anodic catalysts. To evaluate the stability of the B-IrO<sub>2</sub> catalyst, we conducted a static durability test at a current density of 2.8 A·cm<sup>2</sup> for 35 h. The operation began at 2.98 V and remained stable within 4.00 V for the first 24 h, after which the cell voltage increased rapidly. During the operation, the cell was slightly heated up. **Figure S19** illustrates the operation current and voltage after running for 5 h. Overall, the voltage during operation at 2.8 A·cm<sup>2</sup> remains significantly high and is thus far from practical utilization. The performance of our PEMWE with B-IrO<sub>2</sub> can be further improved by meticulous adjustments to the gas diffusion layers (GDLs), catalyst-coated membrane (CCM), gas and fluid channels, and other components.

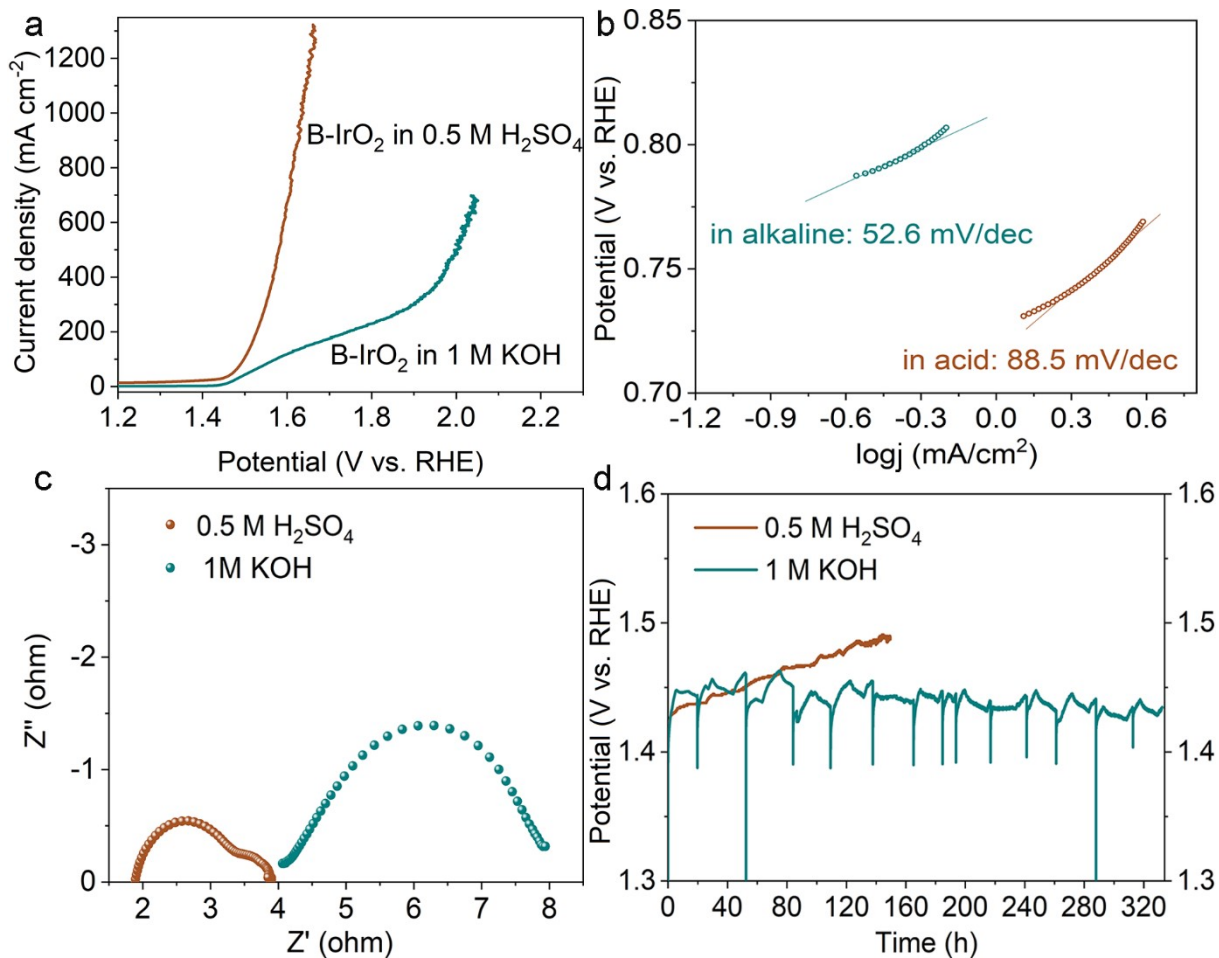

**Figure S20. Electrochemical OER performance of B-IrO<sub>2</sub> in 1 M KOH and 0.5 M H<sub>2</sub>SO<sub>4</sub> electrolytes.** (a) Polarization curves recorded at a scanning rate of 5 mV·s<sup>-1</sup>. (b) Tafel plots derived from the polarization curves shown in (a). (c) Nyquist plots of samples recorded at 1.5 V<sub>RHE</sub>. (d) Chronopotentiometric measurements conducted at 10 mA·cm<sup>-2</sup>.

**Table S1.** Summary of the total pore volumes and micropore volumes of the A-IrO<sub>2</sub>, L-IrO<sub>2</sub>, and B-IrO<sub>2</sub> samples.

| <b>Parameter \ Sample</b>                                      | <b>A-IrO<sub>2</sub></b> | <b>L-IrO<sub>2</sub></b> | <b>B-IrO<sub>2</sub></b> |
|----------------------------------------------------------------|--------------------------|--------------------------|--------------------------|
| Total pore volume<br>(cm <sup>3</sup> ·g <sup>-1</sup> )       | 0.1609                   | 0.2171                   | 0.0995                   |
| t-Plot micropore volume<br>(cm <sup>3</sup> ·g <sup>-1</sup> ) | 0.5159                   | 0.0409                   | 0.0042                   |

**Table S2.** Comparison of the performance of our B-IrO<sub>2</sub> with recently reported B-doped or incorporated IrO<sub>2</sub>-based electrocatalysts for OER.

| Electrocatalysts                                                                                                                         | Electrolyte                              | $\eta@j_{10}$ , mV | $\eta@j_{100}$ , mV | Mass activity @1.55 V <sub>RHE</sub>                                                                      | Stability                                                                      | Ref.                                  |
|------------------------------------------------------------------------------------------------------------------------------------------|------------------------------------------|--------------------|---------------------|-----------------------------------------------------------------------------------------------------------|--------------------------------------------------------------------------------|---------------------------------------|
| <b>B-IrO<sub>2</sub></b>                                                                                                                 | <b>0.5 M H<sub>2</sub>SO<sub>4</sub></b> | <b>218</b>         | <b>268</b>          | <b>3656.3 mA·mg<sup>-1</sup> at the Ir loading of 0.08 mg<sub>Ir</sub>/cm<sup>2</sup></b>                 | <b>150 h @10 mA·cm<sup>-2</sup> &amp; 160 h @ 1 A·cm<sup>-2</sup> for cell</b> | <b>This work</b>                      |
| B-doped amorphous iridium oxide (IrO <sub>x</sub> -B)                                                                                    | 0.1 M HClO <sub>4</sub>                  | 255~292            | /                   | 1523.2 to 5271.6 mA·mg <sup>-1</sup> with the Ir loading from 51 to 5.1 μg <sub>Ir</sub> /cm <sup>2</sup> | 10 h @10 mA·cm <sup>-2</sup>                                                   | Sci. China Mater. 64 (2021) 2958-2966 |
| B-incorporated IrO <sub>2</sub> -Ta <sub>2</sub> O <sub>5</sub> (B <sub>0.6</sub> -IrO <sub>2</sub> -Ta <sub>2</sub> O <sub>5</sub> /Ti) | 0.5 M H <sub>2</sub> SO <sub>4</sub>     | 210                | 264                 | /                                                                                                         | 400 h @100 mA·cm <sup>-2</sup>                                                 | Chem. Eng. J. 491 (2024) 152040       |
| Nanoporous high-entropy catalysts doped with B                                                                                           | Al <sub>94</sub> Co <sub>1</sub>         |                    |                     |                                                                                                           |                                                                                |                                       |
|                                                                                                                                          | Cu <sub>1</sub> Fe <sub>1</sub>          |                    |                     |                                                                                                           |                                                                                |                                       |
|                                                                                                                                          | Mo <sub>1</sub> Ni <sub>1</sub>          | 295                | ~380                | /                                                                                                         | /                                                                              |                                       |
|                                                                                                                                          | B <sub>1</sub>                           | 1.0 M KOH          |                     |                                                                                                           |                                                                                | Nanoscale 16 (2024) 4803-4810         |
|                                                                                                                                          | Al <sub>93</sub> Co <sub>1</sub>         |                    |                     |                                                                                                           |                                                                                |                                       |
|                                                                                                                                          |                                          | 277                | ~350                | /                                                                                                         | 55 h @100 mA·cm <sup>-2</sup>                                                  |                                       |
|                                                                                                                                          |                                          |                    |                     |                                                                                                           |                                                                                |                                       |
|                                                                                                                                          |                                          |                    |                     |                                                                                                           |                                                                                |                                       |
| Ir/B <sub>4</sub> C                                                                                                                      | 0.1 M HClO <sub>4</sub>                  | 283                | /                   | 1396.7 mA·mg <sup>-1</sup>                                                                                | 180 min @10 mA·cm <sup>-2</sup>                                                | J. Power Sources 512 (2021) 230506    |
| IrWB nanochannels                                                                                                                        | 0.5 M H <sub>2</sub> SO <sub>4</sub>     | 291                | 350                 | /                                                                                                         | 800 h @100 mA·cm <sup>-2</sup>                                                 | Nat. Commun. 12 (2021) 3540           |

Note:  $\eta$  stands for the overpotential.

**Table S3.** Mass activities of Ir-based OER electrocatalysts under acidic conditions reported recently.

| Electrocatalysts                                                    | $\eta@j_{10}$ (mV) | Mass activity                                                       | Mass activity @1.55 V <sub>RHE</sub>     | Electrolyte                              | Loading amount                              | Ref.                                          |
|---------------------------------------------------------------------|--------------------|---------------------------------------------------------------------|------------------------------------------|------------------------------------------|---------------------------------------------|-----------------------------------------------|
| <b>B-IrO<sub>2</sub></b>                                            | <b>210</b>         | <b>2589.1 mA·mg<sup>-1</sup></b><br><b>@1.53 V<sub>RHE</sub></b>    | <b>3656.3 mA·mg<sup>-1</sup></b>         | <b>0.5 M H<sub>2</sub>SO<sub>4</sub></b> | <b>0.08 mg<sub>Ir</sub>/cm<sup>2</sup></b>  | <b>This work</b>                              |
| Co-doped SrIrO <sub>3</sub>                                         | 245                | ~1700 mA·mg <sup>-1</sup><br>@1.53 V <sub>RHE</sub>                 | 2445.3 mA·mg <sup>-1</sup>               | 0.5 M H <sub>2</sub> SO <sub>4</sub>     | 0.025 mg/cm <sup>2</sup>                    | Nat. Commun.15 (2024) 2928                    |
| Ir <sub>3</sub> Ni                                                  | 282                | 3720 mA·mg <sub>Ir</sub> <sup>-1</sup><br>@1.58 V <sub>RHE</sub>    | 1860 mA·mg <sub>Ir</sub> <sup>-1</sup>   | 0.2 M HClO <sub>4</sub>                  | 0.102 mg/cm <sup>2</sup>                    | J. Am. Chem. Soc. 146(2024)7858–7867          |
| Ir/WO <sub>3</sub> /CC                                              | 249                | 2858 mA·mg <sup>-1</sup><br>@1.53 V <sub>RHE</sub>                  | 4732.7 mA·mg <sup>-1</sup>               | 0.5 M H <sub>2</sub> SO <sub>4</sub>     | 0.017 mg/cm <sup>2</sup>                    | Angew. Chem. Int. Ed. (2024) e202406947       |
| IrRuNiMoCo                                                          | 243                | 261.5 mA·mg <sub>Ir</sub> <sup>-1</sup><br>@1.53 V <sub>RHE</sub>   | 332.1 mA·mg <sub>Ir</sub> <sup>-1</sup>  | 0.5 M H <sub>2</sub> SO <sub>4</sub>     | 0.15 mg/cm <sup>2</sup>                     | Adv. Mater. 36 (2024) 2314049                 |
| Ir-Ce SSO                                                           | 238                | 637.88 mA·mg <sup>-1</sup><br>@1.55 V <sub>RHE</sub>                | 1057.3 mA·mg <sup>-1</sup>               | 0.5 M H <sub>2</sub> SO <sub>4</sub>     | 396 μg <sub>Ir</sub> /cm <sup>2</sup>       | Adv. Funct. Mater. 34 (2024) 2400809          |
| KIr <sub>4</sub> O <sub>8</sub> Nanowire                            | 266                | 109.6 mA·mg <sup>-1</sup><br>@1.53 V <sub>RHE</sub>                 | 159.6 mA·mg <sup>-1</sup>                | 0.5 M H <sub>2</sub> SO <sub>4</sub>     | 0.281 mg/cm <sup>2</sup>                    | Adv. Mater. 36 (2024) 2402643                 |
| IrO <sub>2</sub> Nano Ribbons                                       | 205                | 2354.5 mA·mg <sup>-1</sup><br>@1.5 V <sub>RHE</sub>                 | /                                        | 0.5 M H <sub>2</sub> SO <sub>4</sub>     | 0.23 mg <sub>Ir</sub> /cm <sup>2</sup>      | Nat. Commun. 14 (2023) 1248                   |
| TaO <sub>x</sub> /IrO <sub>2</sub>                                  | 288                | 345 mA·mg <sup>-1</sup><br>@1.53 V <sub>RHE</sub>                   | 625.3 mA·mg <sup>-1</sup>                | 0.1 M HClO <sub>4</sub>                  | 0.28 mg/cm <sup>2</sup>                     | Nat. Commun. 14 (2023) 5119                   |
| Ir <sub>0.3</sub> Cr <sub>0.7</sub> O <sub>2</sub>                  | 255                | 81.258 mA·mg <sup>-1</sup><br>@1.5 V <sub>RHE</sub>                 | 353.4 mA·mg <sup>-1</sup>                | 0.5 M H <sub>2</sub> SO <sub>4</sub>     | /                                           | Int. J. Hydrogen Energy 48 (2023) 5402-5412   |
| Ir@WO <sub>x</sub> NW                                               | /                  | 812 mA·mg <sub>Ir</sub> <sup>-1</sup><br>@1.55 V <sub>RHE</sub>     | 812 mA·mg <sub>Ir</sub> <sup>-1</sup>    | 0.5 M H <sub>2</sub> SO <sub>4</sub>     | 10.2 μg <sub>Ir</sub> /cm <sup>2</sup>      | Chem. Eng. J. 464 (2023) 142613               |
| Ir-Co <sub>3</sub> O <sub>4</sub>                                   | 236                | 3343.37 mA·mg <sub>Ir</sub> <sup>-1</sup><br>@1.53 V <sub>RHE</sub> | 4477.7 mA·mg <sub>Ir</sub> <sup>-1</sup> | 0.5 M H <sub>2</sub> SO <sub>4</sub>     | 0.018 mg <sub>Ir</sub> /cm <sup>2</sup>     | Nat. Commun. 13 (2022) 7754                   |
| Amorphous Ir atomic clusters on IrO <sub>2</sub>                    | 296                | ~92 mA·mg <sup>-1</sup><br>@1.55 V <sub>RHE</sub>                   | ~92 mA·mg <sup>-1</sup>                  | 1.0 M H <sub>2</sub> SO <sub>4</sub>     | 0.25 mg/cm <sup>2</sup>                     | J. Power Sources 524 (2022) 231069            |
| Nanoneedles Ir <sub>x</sub> Pb nanowire networks                    | 307                | 352 mA·mg <sup>-1</sup><br>@1.53 V <sub>RHE</sub>                   | 810.5 mA·mg <sup>-1</sup>                | 0.1 M HClO <sub>4</sub>                  | /                                           | J. Mater. Chem. A 10 (2022) 11196–11204       |
| Ir <sub>0.7</sub> W <sub>0.2</sub> Sn <sub>0.1</sub> O <sub>x</sub> | 236                | 722.7 mA·mg <sub>Ir</sub> <sup>-1</sup><br>@1.53 V <sub>RHE</sub>   | /                                        | 0.5 M H <sub>2</sub> SO <sub>4</sub>     | 0.3 mg/cm <sup>2</sup>                      | Small 18 (2022) 2203365                       |
| IrO <sub>x</sub> /Ti <sub>4</sub> O <sub>7</sub>                    | 288                | 372 mA·mg <sup>-1</sup><br>@1.55 V <sub>RHE</sub>                   | 372 mA·mg <sup>-1</sup>                  | 0.1 M HClO <sub>4</sub>                  | 0.01 mg/cm <sup>2</sup>                     | Catal. Today 403 (2022) 19–27                 |
| Ir <sub>0.16</sub> Co <sub>0.84</sub> O <sub>x</sub>                | 262                | 1032.16 mA·mg <sup>-1</sup><br>@1.53 V <sub>RHE</sub>               | /                                        | 0.1 M HClO <sub>4</sub>                  | 51.91 μg/cm <sup>2</sup>                    | Electrochim. Acta 432 (2022) 141199           |
| Ir-MnO <sub>2</sub>                                                 | 218                | 766 mA·mg <sup>-1</sup><br>@1.53 V <sub>RHE</sub>                   | /                                        | 0.5 M H <sub>2</sub> SO <sub>4</sub>     | /                                           | Joule 5 (2021) 2164–2176                      |
| IrO <sub>2</sub> -B                                                 | 255~292            | 803 to 2779 mA·mg <sup>-1</sup><br>@1.53 V <sub>RHE</sub>           | 1523.2 to 5271.6 mA·mg <sup>-1</sup>     | 0.1 M HClO <sub>4</sub>                  | 51 to 5.1 μg <sub>Ir</sub> /cm <sup>2</sup> | Sci. China Mater. 64 (2021) 2958–2966         |
| Ir/CP                                                               | 250                | 831.2 mA·mg <sub>Ir</sub> <sup>-1</sup><br>@1.525 V <sub>RHE</sub>  | /                                        | 0.5 M H <sub>2</sub> SO <sub>4</sub>     | 53.9 μg/cm <sup>2</sup>                     | Chem. Eng. J. 420 (2021) 127696               |
| IrO <sub>2</sub> @TiN                                               | 236                | 6.8 A·mg <sub>Ir</sub> <sup>-1</sup><br>@1.6 V <sub>cell</sub>      | /                                        | 0.5 M H <sub>2</sub> SO <sub>4</sub>     | /                                           | Mater. Chem. Front. 5 (2021) 8047–8055        |
| Ir/B <sub>4</sub> C                                                 | 283                | 213 mA·mg <sup>-1</sup><br>@1.48 V <sub>RHE</sub>                   | 767.7 mA·mg <sup>-1</sup>                | 0.5 M H <sub>2</sub> SO <sub>4</sub>     | /                                           | J. Power Sources 512 (2021) 230506            |
| La-Ir NF                                                            | 263                | 1100 mA·mg <sup>-1</sup><br>@1.54 V <sub>RHE</sub>                  | 1396.7 mA·mg <sup>-1</sup>               | 0.1 M HClO <sub>4</sub>                  | 9.6 μg/cm <sup>2</sup>                      | J. Mater. Chem. A 8 (2020) 12518–12525        |
| 30Ir/Au/CP                                                          | 318.7              | 375 mA·mg <sup>-1</sup><br>@1.55 V <sub>RHE</sub>                   | 375 mA·mg <sup>-1</sup>                  | 0.1 M HClO <sub>4</sub>                  | 0.2 mg/cm <sup>2</sup>                      | Applied Catalysis B: Environmental 283 (2021) |
|                                                                     |                    | 440.5 mA·mg <sup>-1</sup><br>@1.9 V <sub>cell</sub>                 | /                                        | 0.5 M H <sub>2</sub> SO <sub>4</sub>     | 0.008 mg/cm <sup>2</sup>                    | Environmental 283 (2021)                      |



|                                                                |     |                                                     |                            |                                       |                          |                                             |
|----------------------------------------------------------------|-----|-----------------------------------------------------|----------------------------|---------------------------------------|--------------------------|---------------------------------------------|
| IrO <sub>2</sub> with dendrite-like nanostructure <sup>s</sup> | 270 | 820 mA·mg <sup>-1</sup><br>@1.55 V <sub>RHE</sub>   | 820 mA·mg <sup>-1</sup>    | 0.5 M H <sub>2</sub> SO <sub>4</sub>  | 0.113 mg/cm <sup>2</sup> | Sustain. Energ. Fuels 4 (2020) 2462-2468    |
| (Mn, Ir)O <sub>2</sub> :10F                                    | 200 | 40 mA·mg <sup>-1</sup><br>@1.45 V <sub>RHE</sub>    | /                          | 0.5 M H <sub>2</sub> SO <sub>4</sub>  | 0.3 mg/cm <sup>2</sup>   | ACS Catal. 9 (2019) 2134-2157               |
| Ir_VG                                                          | 300 | 2700 mA·mg <sup>-1</sup><br>@1.53 V <sub>RHE</sub>  | 5080.3 mA·mg <sup>-1</sup> | 0.5 M H <sub>2</sub> SO <sub>4</sub>  | /                        | J. Mater. Chem. A 7 (2019) 20590–20596      |
| IrO <sub>2</sub> /GCN                                          | 278 | 1280 mA·mg <sup>-1</sup><br>@1.6 V <sub>RHE</sub>   | 507.2 mA·mg <sup>-1</sup>  | 0.5 M H <sub>2</sub> SO <sub>4</sub>  | 81 μg/cm <sup>2</sup>    | Angew. Chem. Int. Ed. 58 (2019) 12540-12544 |
| Li-IrSe <sub>2</sub>                                           | 220 | 66.16 mA·mg <sup>-1</sup><br>@1.44 V <sub>RHE</sub> | /                          | 0.5 M H <sub>2</sub> SO <sub>4</sub>  | 250 μg/cm <sup>2</sup>   | Angew. Chem. Int. Ed. 58 (2019) 14764-14769 |
| Ru@IrO <sub>x</sub>                                            | 282 | 644.8 mA·mg <sup>-1</sup><br>@1.56 V <sub>RHE</sub> | 512.7 mA·mg <sup>-1</sup>  | 0.05 M H <sub>2</sub> SO <sub>4</sub> | 51 μg/cm <sup>2</sup>    | Chem 5 (2019) 445-459                       |
| 6H-SrIrO <sub>3</sub>                                          | 248 | 75 mA·mg <sup>-1</sup><br>@1.525 V <sub>RHE</sub>   | 139.1 mA·mg <sup>-1</sup>  | 0.5 M H <sub>2</sub> SO <sub>4</sub>  | 900 μg/cm <sup>2</sup>   | Nat. Commun. 9 (2018) 5236                  |
| Mesoporous Ir nanosheets                                       | 240 | 260 mA·mg <sup>-1</sup><br>@1.5 V <sub>RHE</sub>    | /                          | 0.5 M H <sub>2</sub> SO <sub>4</sub>  | /                        | J. Am. Chem. Soc. 140 (2018) 12434-12441    |
